# Supplementary material for: Regulation of Hippo/YAP Axis in Colon Cancer Progression by the Deubiquitinase JOSD1
Source: Research Square preprint supplement (doi:10.21203/rs.3.rs-3997002/v1), 2024-03-19
Supplement: Supplementary file 1 [file 188ec4992690884c2ccfe0e8.docx]

**Supplementary Table 1:** **Clinico-pathological correlation of JOSD1 expression in CRC.**

**Supplementary Fig. 1: Depletion of JOSD1 suppressed colorectal cancer progression via the Hippo/YAP signaling pathway, which was partially reversed by overexpressing YAP.**

A: Depletion of JOSD1 reduced the level of YAP protein, which was then restored by overexpressing YAP.

B: Depletion of JOSD1 suppressed the expression of Hippo target genes. YAP overexpression reversed this effect.

C: Depletion of JOSD1 reduced TEAD luciferase activity in SW480 cells. YAP overexpression reversed this effect.

D: The CCK-8 assay measured the cell growth of SW480 cells. The results showed that JOSD1 depletion inhibited their ability to proliferate. However, this effect could be reversed by overexpressing YAP.

E,G: Depletion of JOSD1 reduced the number of colorectal cancer cells that were positive for EdU. YAP overexpression further rescued this effect.

F,H: Depleting JOSD1 reduced the migratory ability of colorectal cancer cells. YAP overexpression reversed this effect.

I,K: Depleting JOSD1 reduced the invasive ability of colorectal cancer cells. YAP overexpression reversed this effect.

J,L: FACs were used to measure the apoptosis of SW480 cells as indicated. Depletion of JOSD1 promoted apoptosis in SW480 cells, and YAP overexpression was found to attenuate this effect. The right panel shows a quantitative summary of the apoptosis analysis using FACS.
